# Supplementary material for: Regulation of Stanniocalcin Secretion by Calcium and PTHrP in Gilthead Seabream (Sparus aurata)
Source: MDPI journal article supplement (doi:10.3390/biology11060863), 2022-06-04

**Regulation of Stanniocalcin secretion by calcium and PTHrP in gilthead seabream  
(*Sparus aurata*)**

Ignacio Ruiz-Jarabo, Silvia F. Gregório and Juan Fuentes

**SUPPLEMENTARY MATERIAL**

**Figure S1. Corpuscles of Stannius in gilthead seabream.** Photograph of the location of the two Stannius corpuscles (red arrows) in the caudal region of the kidney in *Sparus aurata*.

## **Corpuscles of Stannius in *Sparus aurata***

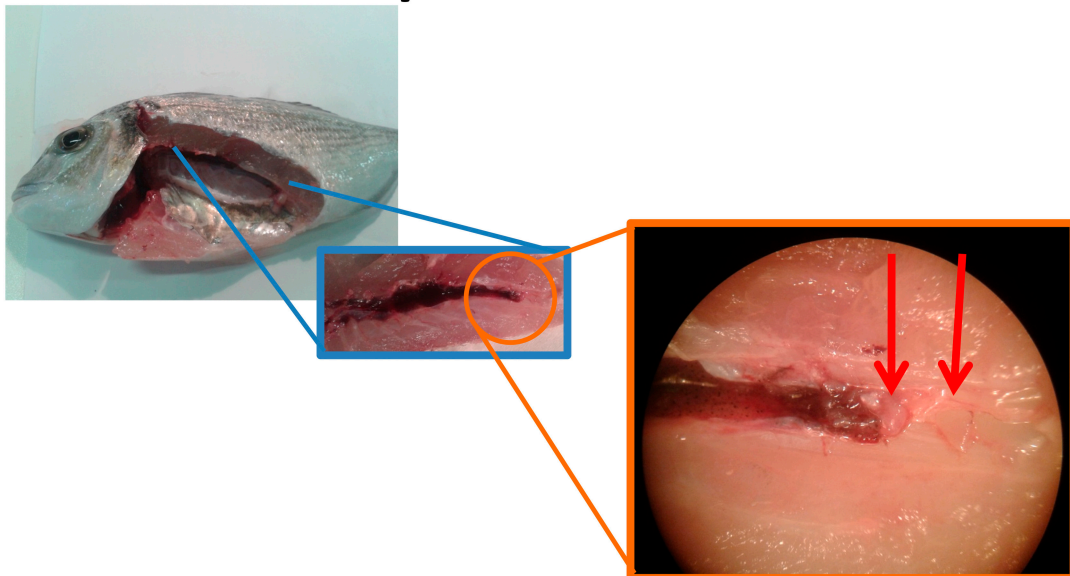

**Figure S2. ELISA displacement curves.** Displacement curves of purified STC standards (standard curve, black dots) and serial dilutions of plasma (white dots) and corpuscles of Stannius (CS) homogenates (black triangles) from gilthead seabream (*Sparus aurata*). Each point is the mean of four determinations. Bi, specifically bound tracer; Bo, maximum bound tracer.

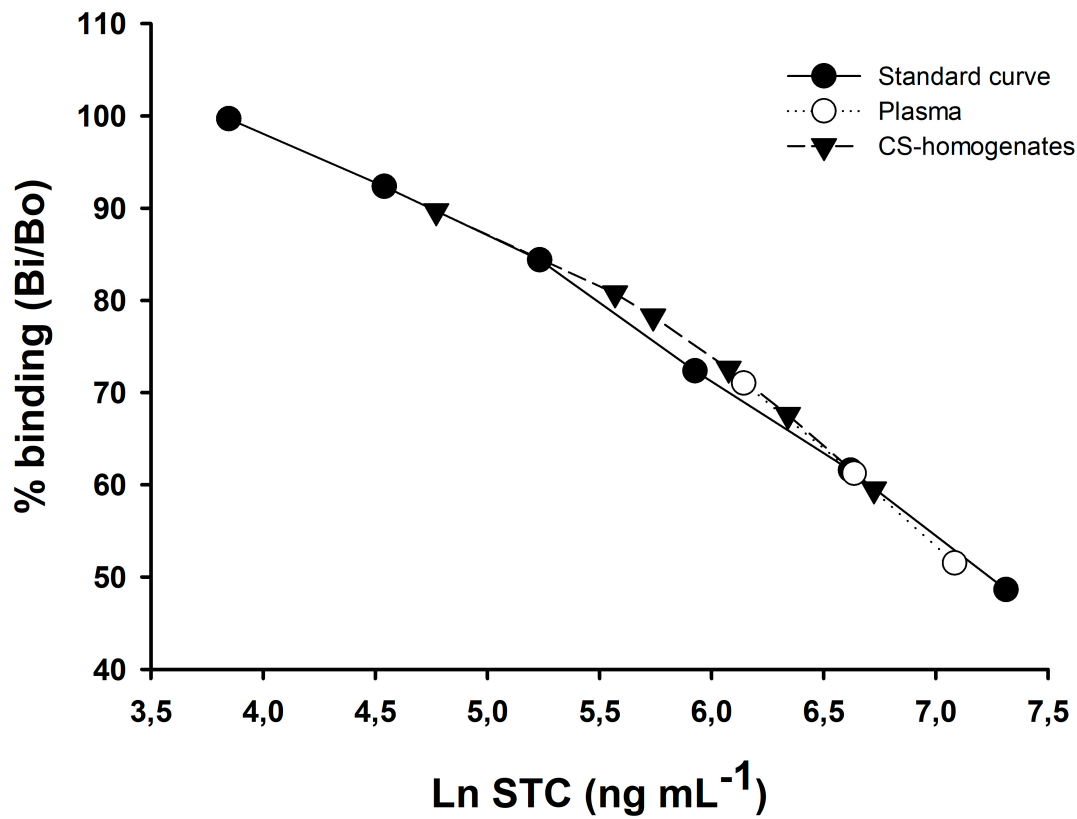

**Figure S3. CS incubation and STC secretion along time.** Secreted STC from *ex vivo* incubated corpuscles of Stannius in the absence (control) or presence of 0.05% DMSO (DMSO). Incubation times were 3, 6 and 24 hours. Values indicate mean  $\pm$  SEM ( $n = 4$ ). Different letters indicate significant differences between groups (two-way ANOVA followed by a Tukey's post-hoc test,  $p < 0.05$ ).

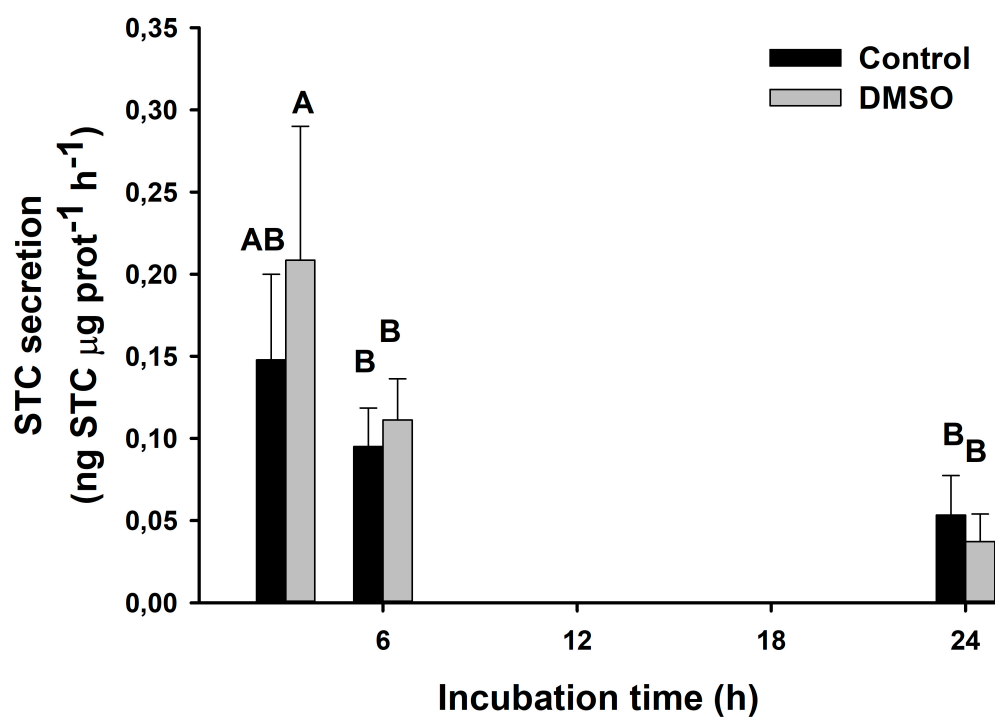

Supplement: s1 [file s1]
